# Supplementary material for: Dosimetric Impact of Voluntary Deep Inspiration Breath Hold (DIBH) in Mediastinal Hodgkin Lymphomas: A Comparative Evaluation of Three Different Intensity Modulated Radiation Therapy (IMRT) Delivery Methods Using Voluntary DIBH and Free Breathing Techniques
Source: MDPI journal article supplement (doi:10.3390/cancers16040690), 2024-02-06
Supplement: s1 [file s1]

## Supplementary Tables

**Supplementary Table S1** shows the heat map of various dosimetric indices of the target volume and the OARs comparing DIBH with the free breathing method for the three different radiotherapy delivery

|              |           | F-VMAT |       | B-VMAT |       | FF-IMRT |       |
|--------------|-----------|--------|-------|--------|-------|---------|-------|
|              |           | DIBH   | FB    | DIBH   | FB    | DIBH    | FB    |
| PTV          | Coverage  | 95.62  | 95.71 | 95.44  | 95.59 | 95.67   | 95.68 |
| LUNG Left    | Mean (Gy) | 5.64   | 6.73  | 5.57   | 7.01  | 5.33    | 6.53  |
|              | V5Gy[%]   | 41.17  | 46.94 | 37.98  | 46.97 | 33.09   | 40.81 |
|              | V10Gy[%]  | 22.16  | 28.14 | 22.77  | 30.64 | 22.43   | 27.54 |
|              | V25Gy[%]  | 1.53   | 2.20  | 1.57   | 2.36  | 1.49    | 1.91  |
| LUNG Right   | Mean (Gy) | 5.74   | 7.01  | 5.59   | 7.11  | 5.40    | 6.78  |
|              | V5Gy[%]   | 42.76  | 52.20 | 38.08  | 48.67 | 34.23   | 43.01 |
|              | V10Gy[%]  | 21.71  | 27.21 | 22.49  | 30.19 | 22.86   | 29.10 |
|              | V25Gy[%]  | 1.36   | 2.08  | 1.43   | 2.11  | 1.20    | 1.66  |
| LUNGS        | Mean (Gy) | 5.69   | 6.87  | 5.58   | 7.05  | 5.36    | 6.66  |
|              | V5Gy[%]   | 41.31  | 49.66 | 37.58  | 47.57 | 33.83   | 41.52 |
|              | V10Gy[%]  | 21.21  | 27.60 | 22.79  | 30.28 | 22.62   | 28.31 |
|              | V25Gy[%]  | 1.47   | 2.11  | 1.48   | 2.24  | 1.32    | 1.76  |
| HEART        | Mean (Gy) | 4.96   | 7.07  | 5.07   | 7.61  | 5.74    | 8.11  |
|              | V5Gy[%]   | 27.96  | 37.09 | 26.39  | 39.25 | 28.97   | 41.88 |
|              | V10Gy[%]  | 19.13  | 26.51 | 18.52  | 30.09 | 22.54   | 32.78 |
|              | V15Gy[%]  | 14.14  | 20.40 | 14.21  | 23.70 | 17.54   | 25.93 |
| BREAST Left  | Mean (Gy) | 5.15   | 5.89  | 4.52   | 5.38  | 4.44    | 4.70  |
|              | V4Gy[%]   | 48.70  | 52.90 | 38.23  | 44.02 | 27.14   | 29.02 |
|              | V10Gy[%]  | 13.16  | 19.65 | 14.97  | 22.89 | 20.42   | 22.24 |
| BREAST Right | Mean (Gy) | 4.23   | 4.94  | 3.63   | 4.47  | 3.26    | 3.57  |
|              | V4Gy[%]   | 42.38  | 47.60 | 33.71  | 38.73 | 21.59   | 23.41 |
|              | V10Gy[%]  | 8.19   | 13.62 | 12.13  | 16.88 | 15.78   | 17.04 |

F-VMAT: Full Arc Volumetric Arc Therapy; B-VMAT: Butterfly Volumetric Arc Therapy;  
FF-IMRT: Fixed field Intensity Modulated Radiotherapy

**Supplementary Table-S2A. Shows the dosimetric indices of the OARs comparing three different delivery techniques with DIBH**

| Oorgan's At Risk       | F-VMAT DIBH |              | B-VMAT DIBH |              | FF-IMRT DIBH |             | Between Groups P-value |
|------------------------|-------------|--------------|-------------|--------------|--------------|-------------|------------------------|
| Dosimetry              | B-VMAT DIBH | FF-IMRT DIBH | F-VMAT DIBH | FF-IMRT DIBH | F-VMAT DIBH  | B-VMAT DIBH |                        |
| Lung_L Mean Gy         | 1.000       | 0.887        | 1.000       | 0.699        | 0.887        | 0.699       | 0.428                  |
| Lung_L_V5Gy            | 0.694       | 0.010        | 0.694       | 0.205        | 0.010        | 0.205       | 0.012                  |
| Lung_L_V10Gy           | 1.000       | 1.000        | 1.000       | 1.000        | 1.000        | 1.000       | 0.966                  |
| Lung_L_V25Gy           | 1.000       | 1.000        | 1.000       | 1.000        | 1.000        | 1.000       | 0.938                  |
| Lung_R Mean Gy         | 1.000       | 1.000        | 1.000       | 1.000        | 1.000        | 1.000       | 0.732                  |
| Lung_R_V5Gy            | 0.433       | 0.027        | 0.433       | 0.683        | 0.027        | 0.683       | 0.032                  |
| Lung_R_V10Gy           | 1.000       | 1.000        | 1.000       | 1.000        | 1.000        | 1.000       | 0.867                  |
| Lung_R_V25Gy           |             |              |             |              |              |             | 0.705                  |
| Lungs Mean Gy          | 1.000       | 1.000        | 1.000       | 1.000        | 1.000        | 1.000       | 0.640                  |
| Lungs_V5Gy             | 0.504       | 0.020        | 0.504       | 0.493        | 0.020        | 0.493       | 0.025                  |
| Lungs_V10Gy            | 1.000       | 1.000        | 1.000       | 1.000        | 1.000        | 1.000       | 0.684                  |
| Lungs_V25 Gy           | 1.000       | 1.000        | 1.000       | 1.000        | 1.000        | 1.000       | 0.565                  |
| Heart_Mean Gy*         |             |              |             |              |              |             | 0.545                  |
| Heart_V5Gy*            |             |              |             |              |              |             | 0.898                  |
| Heart_V10Gy*           |             |              |             |              |              |             | 0.546                  |
| Heart_V15Gy*           |             |              |             |              |              |             | 0.400                  |
| Breast_L Mean Gy       | 1.000       | 0.991        | 1.000       | 1.000        | 0.991        | 1.000       | 0.561                  |
| Breast_L_V4Gy*         |             |              |             |              |              |             | 0.074                  |
| Breast_L_V10Gy*        |             |              |             |              |              |             | 0.108                  |
| Breast_R Mean Gy*      |             |              |             |              |              |             | 0.140                  |
| Breast_R_V4Gy          | 1.000       | 0.033        | 1.000       | 0.262        | 0.033        | 0.262       | 0.035                  |
| Breast_R_V10 Gy        | 0.671       | 0.026        | 0.671       | 0.483        | 0.026        | 0.483       | 0.032                  |
| Thyroid Mean Gy*       |             |              |             |              |              |             | 0.954                  |
| Monitor Units (MU)     | 1.000       | <0.05        | 1.000       | <0.05        | <0.05        | <0.05       | <0.05                  |
| Homogeneity Index (HI) | 0.045       | 1.000        | 0.045       | 0.083        | 1.000        | 0.083       | 0.028                  |
| Conformity Index (CI)  | 0.374       | <0.05        | 0.374       | <0.05        | <0.05        | <0.05       | <0.05                  |

Shapiro-Wilk's test was used to check the normality of the dataset. If the P value of Shapiro-Wilk's test was  $P > 0.05$ , the data was considered to be normally distributed and a parametric test i.e. one-way ANOVA test was used to compare all three different treatment techniques. If the P value of Shapiro-Wilk's test was  $P < 0.05$ , the distribution of the data was not considered to be normal and a non-parametric Kruskal-Wallis test was used.

\*In the normality check, it was observed that Lung\_L Mean Gy, Lung\_L\_V5Gy, Lung\_L\_V10Gy, Lung\_L\_V25Gy, Lung\_R Mean Gy, Lung\_R\_V5Gy, Lung\_R\_V10Gy, Lungs\_Mean Gy, Lungs\_V5Gy, Lungs\_V10Gy, Lungs\_V25Gy Breast\_L\_MeanGy, Homogeneity Index were normally distributed variables, so for those variables ANOVA test was used and pairwise comparison was done by Bonferroni's Correction.

Significant P values were highlighted. Variables (Lung\_R\_V25Gy, Heart\_Mean Gy, Heart\_V5Gy, Heart\_V10Gy, Heart\_V15Gy, Breast\_L\_V4Gy, Breast\_L\_V10Gy, Breast\_R\_Mean Gy, Breast\_R\_V4Gy, Breast\_R\_V10Gy, Thyroid Mean Gy, Monitor Units, Conformity Index ) were not normally distributed variables, So for these variables, Kruskal Walli's test was used and pairwise comparison was done only for significant variables (Breast\_R\_V4Gy, Breast\_R\_V10Gy, Monitor Units, Conformity Index). Significant P values are highlighted. Kruskal Walli's test does not provide pairwise comparisons if the overall p-value is not significant, hence the table does not show the p-values.

**Supplementary Table-S2B. Shows the dosimetric indices of the OARs comparing three different delivery techniques with the Free Breathing method**

| Oorgan's At Risk<br>Dosimetry | F-VMAT FB    |               | B-VMAT FB    |               | FF-IMRT FB   |              | Between<br>Groups P<br>value |
|-------------------------------|--------------|---------------|--------------|---------------|--------------|--------------|------------------------------|
|                               | B-VMAT<br>FB | FF-IMRT<br>FB | F-VMAT<br>FB | FF-IMRT<br>FB | F-VMAT<br>FB | B-VMAT<br>FB |                              |
| Lungs_Mean Gy                 | 1.000        | 0.093         | 1.000        | 0.020         | 0.093        | 0.020        | 0.017                        |
| Lung_L_V5Gy                   | 1.000        | 0.125         | 1.000        | 0.123         | 0.125        | 0.123        | 0.063                        |
| Lung_L_V10Gy                  | 1.000        | 1.000         | 1.000        | 0.957         | 1.000        | 0.957        | 0.325                        |
| Lung_L_V25Gy                  | 1.000        | 1.000         | 1.000        | 0.725         | 1.000        | 0.725        | 0.492                        |
| Lung_R_Mean Gy*               |              |               |              |               |              |              | 0.738                        |
| Lung_R_V5Gy*                  |              |               |              |               |              |              | 0.061                        |
| Lung_R_V10Gy*                 |              |               |              |               |              |              | 0.620                        |
| Lung_R_V25Gy*                 |              |               |              |               |              |              | 0.333                        |
| Lungs_Mean Gy*                |              |               |              |               |              |              | 0.594                        |
| Lungs_V5Gy                    | 1.000        | 0.053         | 1.000        | 0.224         | 0.053        | 0.224        | 0.047                        |
| Lungs_V10Gy*                  |              |               |              |               |              |              | 0.492                        |
| Lungs_V25Gy                   | 1.000        | 0.880         | 1.000        | 0.444         | 0.880        | 0.444        | 0.325                        |
| Heart_Mean Gy                 | 1.000        | 0.739         | 1.000        | 1.000         | 0.739        | 1.000        | 0.508                        |
| Heart_V5Gy                    | 1.000        | 1.000         | 1.000        | 1.000         | 1.000        | 1.000        | 0.648                        |

|                           |       |       |       |       |       |       |       |
|---------------------------|-------|-------|-------|-------|-------|-------|-------|
| Heart_V10Gy               | 1.000 | 0.335 | 1.000 | 1.000 | 0.335 | 1.000 | 0.277 |
| Heart_V15Gy               | 0.977 | 0.305 | 0.977 | 1.000 | 0.305 | 1.000 | 0.255 |
| Breast_L_Mean*<br>Gy      |       |       |       |       |       |       | 0.622 |
| Breast_L_V4Gy             | 1.000 | 0.018 | 1.000 | 0.095 | 0.018 | 0.095 | 0.015 |
| Breast_L_V10Gy*           |       |       |       |       |       |       | 0.308 |
| Breast_R_Mean*<br>Gy      |       |       |       |       |       |       | 0.115 |
| Breast_R_V4Gy             | 0.950 | 0.003 | 0.950 | 0.061 | 0.003 | 0.061 | 0.003 |
| Breast_R_V10Gy*           |       |       |       |       |       |       | 0.115 |
| Thyroid Mean Gy*          |       |       |       |       |       |       | 0.995 |
| Monitor Units<br>(MU)     | 0.053 | <0.05 | 0.053 | <0.05 | <0.05 | <0.05 | 0.000 |
| Homogeneity<br>Index (HI) | 0.300 | 1.000 | 0.300 | 0.171 | 1.000 | 0.171 | 0.119 |
| Conformity Index<br>(CI)  | 0.002 | <0.05 | 0.002 | 0.046 | <0.05 | 0.046 | 0.000 |

Shapiro-Wilk's test was used to check the normality of the dataset. If the P value of Shapiro-Wilk's test was  $P > 0.05$ , the data was considered to be normally distributed and a parametric test i.e. one-way ANOVA test was used to compare all three different treatment techniques. If the P value of Shapiro-Wilk's test was  $P < 0.05$ , the distribution of the data was not considered to be normal and a non-parametric Kruskal-Wallis test was used.

\*In the normality check, it was observed that Lung\_L Mean Gy, Lung\_L\_V5Gy, Lung\_L\_V10Gy, Lung\_L\_V25Gy, Lungs\_V5Gy, Lungs\_V25Gy, HI, Heart\_Mean Gy, Heart\_V5Gy, Heart\_V10Gy, Heart\_V15Gy were normally distributed variables, so for those variables ANOVA test was used and pairwise comparison was done by Bonferroni's Correction. Significant p- p-values are highlighted. Variables (Lung\_R\_Mean Gy, Lung\_R\_V5Gy, Lung\_R\_V10Gy, Lung\_R\_V25Gy, Lungs\_Mean Gy, Lungs\_V10Gy, Breast\_L\_MeanGy, Breast\_L\_V4Gy, Breast\_L\_V10Gy, Breast\_R\_Mean Gy, Breast\_R\_V4Gy, Breast\_R\_V10Gy, Thyroid Mean Gy, Monitor Units) were not normally distributed, so for these variables Kruskal Walli's test was used and pairwise comparison was done only for significant variables. (Breast\_L\_V4Gy, Breast\_R\_V10Gy, Monitor Units,). Significant P values were highlighted. Kruskal Walli's test does not provide pairwise comparisons if the overall p-value is not significant, hence the table does not show the p-values.
